# Supplementary material for: Drosophila ryanodine receptor gene triggers functional and developmental muscle properties and could be used to assess the impact of human RYR1 mutations
Source: eLife. 2026 May 13;15:RP111053. doi: 10.7554/eLife.111053 (PMC13171102; doi:10.7554/eLife.111053)
Supplement: Figure 1—source data 1. [file elife-111053-fig1-data1.xlsx]

## Sheet: Fig1E - Righting assay
Fig 1E Righting assay
C57>mCherry RNAi	C57>dRyR RNAi	C57>LacZ	C57>dRyR
5	24	7	16
5	40	8	13
11	35	7	31
7	80	7	9
12	54	7	12
15	33	3	4
8	62	2	8
7	36	9	8
11	75	5	14
17	22	4	18
11	54	5	23
5	15	7	7
8	18	2	10
7	64	3	7
6	48	8	12
9	83	4	14
6	38	6	21
8	46	4	14
9	32	7	11
8	52	6	10
7	30	11	16
6	34	8	15
2	72	10	11
7	34	9	15
5	44	11	21
5	64	7	8
8	42	3	17
6	90	13	7
4	31	10	27
7	18	11	13
4	35		22
9	23		11

## Sheet: Fig2F - Motility test 
Fig 1F Motility test
C57>mCherry RNAi	C57>dRyR RNAi	C57>LacZ	C57>dRyR
37	25	48	25
38	24	47	26
28	24	42	27
49	25	46	39
41	15	50	32
23	22	53	41
37	15	59	36
33	16	39	29
37	17	51	22
25	21	52	34
48	30	51	40
55	31	58	42
34	28	54	43
48	29	49	39
46	25	48	28
42	22	44	45
49	29	54	26
44	28	53	21
41	23	52	39
44	32	58	38
47	25	59	30
42	24	42	25
47	26	53	30
49	28	54	26
48	34	38	27
44	25	48	43
48	27	54	45
49	25	57	25
40	16	42	26
53	10	56	24
47	22		24
40	26		36

## Sheet: Fig2G - Locomotor assay
Fig 1G Locomotor assay
C57>mCherry RNAi	C57>RyR RNAi	C57>LacZ	C57>RyR
61	323	74	102
75	131	87	126
104	150	62	99
64	293	46	98
79	317	55	120
104	114	50	148
83	277	62	106
61	92	51	121
66	102	48	105
106	381	66	95
79	325	54	114
83	384	61	84
70	374	58	103
66	405	47	94
75	351	71	97
80	367	51	100
90	109	50	99
70	383	59	100
76	322	72	118
105	281	46	115
61	91	52	90
83	349	49	85
48	291	42	74
103	344	52	85
56	301	65	80
58	398	64	90
69	337	47	67
54	348	72	110
59	231	55	109
68	331	48	67
69			61
115			70
