# Supplementary material for: Drosophila ryanodine receptor gene triggers functional and developmental muscle properties and could be used to assess the impact of human RYR1 mutations
Source: eLife. 2026 May 13;15:RP111053. doi: 10.7554/eLife.111053 (PMC13171102; doi:10.7554/eLife.111053)
Supplement: Figure 2—figure supplement 1—source data 1. [file elife-111053-fig2-figsupp1-data1.xlsx]

## Sheet: Fig 2S
Fig 2S
C57>mCherry RNAi	C57>dRyR RNAi	C57>LacZ	C57>dRyR
16.3959	14.7885	12.1408	12.2648
11.7232	11.9726	11.2349	10.6638
14.6276	11.3715	8.4523	7.7623
12.0982	11.4185	14.4236	15.4063
14.453	10.7552	12.3804	9.2476
15.8384	11.1938	12.9127	10.3584
20.4167	9.1022	9.6463	11.8993
13.2795	14.7499	10.8392	7.4199
17.2633	18.0148	16.5058	9.41212
12.2512	11.8613	13.6144	8.2546
14.132	9.8928	9.2484	7.2496
11.9201	10.2943	12.1116	10.7297
13.55	8.6616	11.4808	7.17522
11.7875	7.4104	20.9894	9.0075
14.5201	7.9975	14.3097	7.6907
11.0205	11.3365	10.4326	8.6052
11.7506	8.614	11.7687	6.406
13.8008	9.7849	16.4095	13.8889
15.7583	7.6283	9.9354	7.9781
10.7409	9.8738	10.6836	9.32737
14.9037	9.4238	10.8709	7.93144
11.7707	10.2515	9.7491	8.1128
13.1741		11.4015	6.3159
12.6647		14.9514	9.9541
12.5054		13.8496	12.2977
12.5215		16.0955	13.4584
13.4926			11.0606
15.7327			12.5593
