# Supplementary material for: Drosophila ryanodine receptor gene triggers functional and developmental muscle properties and could be used to assess the impact of human RYR1 mutations
Source: eLife. 2026 May 13;15:RP111053. doi: 10.7554/eLife.111053 (PMC13171102; doi:10.7554/eLife.111053)
Supplement: Figure 2—source data 1. [file elife-111053-fig2-data1.xlsx]

## Sheet: Fig2F - Heart period
Fig 2F Heart period
Hand/+	dRyR RNAi/+	Hand>dRyR RNAi	UAS dRyR/+	Hand>dRyR
0.596	0.548	2.263	0.455	0.455
0.871	1.033	1.038	0.554	0.408
0.467	0.994	2.563	0.422	0.359
0.478	0.422	2.556	0.498	0.961
0.277	0.826	1.12	0.313	0.903
0.389	1.223	3.193	0.314	0.969
0.352	0.388	1.471	0.684	0.354
0.418	0.688	2.034	0.529	0.53
0.481	1.548	2.525	0.344	0.512
0.441	0.494	0.932	0.339	0.575
0.39	0.478	1.602	0.358	0.465
0.532	1.098	1.794	0.374	0.514
0.393	0.75	0.725	0.386	0.597
0.568	0.604	1.334	0.398	0.374
0.331	0.578	2.911	0.502	0.766
0.408	0.79	2.105	0.401	0.476
0.557	1.076	1.708	0.392	0.564
0.341	0.673	1.968	0.338	0.419
0.406	0.825	3.528	0.495	0.332
0.306	0.476	1.77	0.392	0.37
0.324	0.627	1.849	0.523	0.571
0.397	0.602	1.51	0.69	0.437

## Sheet: Fig2G - Heart rate
Fig 2G Heart rate
Hand/+	dRyR RNAi/+	Hand>dRyR RNAi	UAS dRyR/+	Hand>dRyR
1.84	1.826	0.53	2.201	2.219
1.314	0.974	1.239	1.902	2.569
2.179	1.32	0.641	2.389	2.832
2.12	2.434	0.404	2.034	1.102
3.631	1.211	0.917	3.208	1.334
2.605	0.819	0.484	3.188	1.439
2.858	2.581	0.797	1.47	2.845
2.391	1.521	0.547	1.893	1.898
2.081	0.648	0.553	2.919	2.045
2.336	2.029	1.081	2.971	1.962
2.762	2.104	0.644	2.798	2.19
1.909	0.916	0.578	2.789	2.012
2.621	1.343	1.38	2.592	1.7
1.836	1.658	0.756	2.526	2.686
3.087	1.737	0.535	2.014	1.307
2.473	1.268	1.171	2.508	2.115
1.926	1.244	0.682	2.578	1.832
3.389	1.619	0.73	2.962	2.443
2.499	1.226	0.56	2.105	3.03
3.436	2.13	0.904	2.738	2.705
3.089	1.612	0.617	1.932	2.192
2.545	1.749	0.721	1.461	2.291

## Sheet: Fig2H - Diastolic interval
Fig 2H Diastolic interval
Hand/+	dRyR RNAi/+	Hand>dRyR RNAi	UAS dRyR/+	Hand>dRyR
0.342	0.318	2.03	0.206	0.224
0.59	0.886	0.808	0.268	0.192
0.207	0.741	2.338	0.188	0.137
0.173	0.213	2.291	0.236	0.66
0.107	0.55	0.853	0.106	0.654
0.173	0.903	2.92	0.141	0.88
0.131	0.178	1.359	0.363	0.159
0.14	0.475	1.802	0.234	0.342
0.265	1.227	2.441	0.118	0.273
0.182	0.277	0.646	0.139	0.347
0.161	0.267	1.349	0.132	0.232
0.246	0.801	1.599	0.225	0.228
0.261	0.479	0.42	0.124	0.289
0.296	0.339	1.026	0.174	0.158
0.126	0.344	2.674	0.212	0.521
0.126	0.717	1.9	0.133	0.19
0.289	0.789	1.378	0.182	0.335
0.168	0.462	1.726	0.122	0.282
0.14	0.529	3.269	0.398	0.172
0.107	0.238	1.652	0.278	0.118
0.085	0.565	1.534	0.257	0.356
0.188	0.363	1.265	0.402	0.174

## Sheet: Fig2I - Systolic interval
Fig 2I Systolic interval
Hand/+	dRyR RNAi/+	Hand>dRyR RNAi	UAS dRyR/+	Hand>dRyR
0.254	0.23	0.233	0.249	0.23
0.281	0.147	0.23	0.287	0.216
0.261	0.254	0.224	0.234	0.223
0.305	0.209	0.265	0.263	0.301
0.169	0.276	0.267	0.206	0.249
0.216	0.319	0.273	0.173	0.089
0.221	0.21	0.112	0.322	0.195
0.278	0.214	0.231	0.295	0.188
0.216	0.321	0.084	0.226	0.239
0.259	0.218	0.285	0.2	0.228
0.228	0.21	0.253	0.226	0.233
0.287	0.297	0.195	0.149	0.286
0.132	0.271	0.306	0.262	0.308
0.271	0.265	0.308	0.224	0.216
0.205	0.234	0.237	0.29	0.245
0.282	0.073	0.205	0.268	0.286
0.268	0.287	0.33	0.21	0.229
0.174	0.211	0.242	0.216	0.137
0.266	0.295	0.259	0.098	0.16
0.199	0.238	0.117	0.114	0.251
0.24	0.063	0.315	0.266	0.216
0.209	0.239	0.245	0.287	0.263

## Sheet: Fig2J - Arrhythmia index
Fig 2J Arrhythmia index
Hand/+	dRyR RNAi/+	Hand>dRyR RNAi	UAS dRyR/+	Hand>dRyR
0.241	0.026	0.457	0.05	0.102
0.354	0.083	0.805	0.262	0.204
0.131	1.448	1.96	0.088	0.149
0.132	0.094	0.219	0.122	0.178
0.067	0.027	0.183	0.045	0.647
0.097	0.033	0.853	0.045	0.354
0.079	0.022	0.574	0.072	0.074
0.02	0.222	0.492	0.029	0.09
0.046	0.057	1.173	0.075	0.194
0.182	0.049	0.081	0.08	0.351
0.21	0.064	0.221	0.052	0.13
0.107	0.08	0.216	0.163	0.187
0.174	0.087	0.031	0.042	0.113
0.159	0.031	0.097	0.069	0.086
0.147	0.06	2.097	0.102	0.037
0.11	0.046	1.062	0.065	0.09
0.314	1.132	0.622	0.107	0.227
0.343	0.17	1.254	0.041	0.139
0.127	0.081	2.759	0.136	0.105
0.224	0.127	0.239	0.262	0.019
0.038	0.1	0.435	0.098	1.725
0.101	0.142	0.404	0.082	0.039

## Sheet: Fig2K - Systolic diameter
Fig 2K Systolic diameter
Hand/+	dRyR RNAi/+	Hand>dRyR RNAi	UAS dRyR/+	Hand>dRyR
53.5922	39.9091	80.9585	57.013	59.2935
52.452	46.7507	70.6961	50.1714	63.8546
55.8727	39.9091	86.6598	70.6961	58.1533
49.0312	57.013	74.1169	46.7507	50.1714
58.1533	49.0312	74.1169	50.1714	62.7143
54.7325	44.4701	64.9948	49.0312	46.7507
58.1533	37.6286	57.013	58.1533	53.5922
53.5922	38.7688	64.9948	53.5922	72.9766
62.7143	60.4338	63.8546	49.0312	69.5559
43.3299	38.7688	63.8546	46.7507	66.1351
51.3117	44.4701	67.2753	57.013	52.452
41.0494	57.013	83.239	39.9091	61.574
53.5922	79.8182	61.574	52.452	53.5922
68.4156	51.3117	66.1351	43.3299	62.7143
57.013	52.452	70.6961	53.5922	64.9948
43.3299	52.452	86.6598	61.574	76.3974
57.013	54.7325	68.4156	46.7507	50.1714
64.9948	55.8727	66.1351	53.5922	64.9948
61.574	43.3299	75.2572	49.0312	52.452
57.013	45.6104	61.574	54.7325	47.8909
46.7507	44.4701	57.013	61.574	71.8364
53.5922	39.9091	71.8364	52.452	62.7143

## Sheet: Fig2L - Diastolic diameter
Fig 2L Diastolic diameter
Hand/+	dRyR RNAi/+	Hand>dRyR RNAi	UAS dRyR/+	Hand>dRyR
87.8	78.6779	88.9403	83.239	98.0624
79.8182	76.3974	91.2208	83.239	111.745
91.2208	77.5377	94.6416	103.764	96.9221
70.6961	92.3611	88.9403	79.8182	88.9403
100.343	83.239	91.2208	78.6779	109.465
86.6598	78.6779	86.6598	85.5195	85.5195
84.3792	78.6779	78.6779	94.6416	90.0805
85.5195	72.9766	84.3792	88.9403	99.2026
84.3792	100.343	85.5195	88.9403	96.9221
82.0987	72.9766	84.3792	86.6598	102.623
93.5013	71.8364	93.5013	88.9403	85.5195
77.5377	93.5013	96.9221	62.7143	103.764
82.0987	122.008	69.5559	82.0987	88.9403
104.904	86.6598	82.0987	66.1351	92.3611
100.343	98.0624	82.0987	77.5377	99.2026
67.2753	86.6598	91.2208	76.3974	99.2026
90.0805	94.6416	87.8	77.5377	93.5013
100.343	93.5013	83.239	87.8	91.2208
99.2026	78.6779	91.2208	77.5377	90.0805
94.6416	88.9403	86.6598	76.3974	82.0987
83.239	84.3792	82.0987	85.5195	118.587
84.3792	70.6961	86.6598	87.8	100.343

## Sheet: Fig2M - Fractional shortening
Fig 2M Fractional shortening
Hand/+	dRyR RNAi/+	Hand>dRyR RNAi	UAS dRyR/+	Hand>dRyR
0.3896	0.4521	0.1687	0.3151	0.3953
0.3429	0.3944	0.1351	0.3973	0.4286
0.3875	0.4198	0.1268	0.3187	0.4
0.3065	0.4198	0.2462	0.4143	0.4359
0.4205	0.4265	0.1452	0.3623	0.4271
0.3684	0.3409	0.1733	0.4267	0.4533
0.3108	0.507	0.1507	0.3855	0.4051
0.3733	0.3721	0.1875	0.3974	0.2644
0.2568	0.2958	0.1449	0.4487	0.2824
0.4722	0.4267	0.1829	0.4605	0.3556
0.4512	0.506	0.254	0.359	0.3867
0.4706	0.2537	0.1944	0.3636	0.4066
0.3472	0.2375	0.0758	0.3611	0.3974
0.3478	0.358	0.1642	0.3448	0.321
0.4318	0.4571	0.125	0.3088	0.3448
0.3559	0.3934	0.1186	0.194	0.2299
0.3671	0.4557	0.1698	0.3971	0.4634
0.3523	0.4861	0.1585	0.3896	0.2875
0.3793	0.4756	0.1264	0.3676	0.4177
0.3976	0.4545	0.1667	0.2836	0.4167
0.4384	0.2785	0.0769	0.28	0.3942
0.3649	0.3708	0.1268	0.4026	0.375
