# Supplementary material for: Drosophila ryanodine receptor gene triggers functional and developmental muscle properties and could be used to assess the impact of human RYR1 mutations
Source: eLife. 2026 May 13;15:RP111053. doi: 10.7554/eLife.111053 (PMC13171102; doi:10.7554/eLife.111053)
Supplement: Figure 3—source data 1. [file elife-111053-fig3-data1.xlsx]

## Sheet: Fig 3Q - Larva length
Fig 3Q Larva length
C57>mCherry RNAi	C57>dRyR RNAi	C57>LacZ	C57>dRyR
4	3.2	3.8	4
3.8	3.5	3.4	3.8
4	3.5	4	3.8
3.8	4	4.2	3.2
3.7	3	3.8	3.2
4	3.5	4	3.4
3.6	3	3.8	3.8
3.5	3.2	4	3.8
4	4	4.1	4
3.9	3.8	3.9	4
4	3.5	4	3.8
4	3.2	4	3.6
3.9	3.2	4	3.5
3.8	3.2	4.1	3.6
4	3.2	4.2	3.4
3.8	3.5	4	3.5
4	3.8	4.1	3.8
4	3.5	4	3.8
4		3.8	3.8
3.8		4.1	4
4			4
4			4

## Sheet: Fig3R - Muscle VLM3 size 
Fig 3R Muscle VLM3 size
C57>mCherry RNAi	C57>RyR RNAi	C57>LacZ	C57>RyR
414.586	239	375.398	277
343.943	282	375.005	347
312.601	251	362.678	327
416.761	220	353.791	374
301.601	259	353.846	336
329.211	247	362.903	340
289.394	279	352.13	359
331.436	356	393.572	358
352.41	353	360.228	241
408.178	279	325.766	282
306.824	275	321.239	317
327.257	316	432.842	228
393.345	280	436.151	281
309.54	234	370.996	258
307.25	306	363.636	369
368.531	290	418.112	348
309.754	321	363.371	326
421.913	324	378.058	362
352.002	207	374.298	314
384.125	247	369.849	339
406.366	242	376.174	291
351.515	326	363.665	366
412.826	292	375.012	323
324.498	320	333.388	306
326.447	264	353.846	292
319.735	303	337.88	290
302.122	252	349.571	297
291.687	266	424.76	362
	257	393.151	315
	321		344
	306		299
			297
			296

## Sheet: Fig 3S -Number of nuclei (VLM3)
Fig 3S Number of nuclei (VLM3)
C57>mCherry RNAi	C57>RyR RNAi	C57>LacZ	C57>RyR
14	17		12
13	14	13	11
16	11	13	15
16	15	12	13
14	16	14	11
15	11	15	15
16	12	16	13
15	14	14	17
15	12	15	16
16	14	16	14
12	15	12	13
17	11	14	14
14	15	13	11
12	12	14	14
16	18	13	12
13	10	15	10
16	10	15	9
16	12	13	11
16	11	14	14
17	12	15	14
15	15	13	12
17	10	13	13
13	13	14	13
19	13	14	10
17	16	16	13
12	12	14	12
17	14	13	13
15	15	14	13
	13	15

## Sheet: Fig 3T - Sarcomere size
Fig 3T Sarcomere size
C57>mCherry RNAi	C57>RyR RNAi	C57>LacZ	C57>RyR
6.35827	3.44821	6.2246	5.715
6.03319	5.31389	6.98471	6.162
5.71935	5.08737	6.80614	4.45182
6.69236	4.8785	7.51869	6.44933
6.28606	5.3	7.44685	5.32444
5.99644	4.7465	6.8885	4.8855
6.4112	4.947	5.69982	5.06
6.53807	5.50118	7.61392	5.32167
6.4356	5.55824	7.17457	4.61619
7.19785	5.37263	6.15669	4.57524
7.11771	5.54278	7.58023	4.8081
6.34093	5.15947	7.01523	4.7045
5.92206	3.57259	6.70257	4.61952
5.78082	4.64095	8.534	3.9512
5.0521	4.90737	8.36525	5.11421
5.06216	4.7845	8.06025	4.19043
6.42253	5.9275	6.70679	6.63571
5.96281	3.7068	7.07079	4.7345
6.58767	3.28733	7.864	4.9585
6.35553	4.7695	7.21108	5.04579
5.45033	5.19333	6.80343	6.366
5.86881	6.10875	7.77862	6.165
6.03331	5.42556	7.30508	4.56864
6.25094	5.88063	6.83207	4.80381
6.12569	5.24737	6.4944	4.29318
5.89365	4.02875	6.36113	4.34136
7.13571	4.97316	5.35937	4.8275
6.4	5.07059	6.51194	5.34053
7.32464	4.645	6.59886	5.78471
6.51687	5.26389	6.43507	5.80059
5.9705		7.65346	5.70353
6.16237		7.16636	5.55
