# Supplementary material for: Drosophila ryanodine receptor gene triggers functional and developmental muscle properties and could be used to assess the impact of human RYR1 mutations
Source: eLife. 2026 May 13;15:RP111053. doi: 10.7554/eLife.111053 (PMC13171102; doi:10.7554/eLife.111053)
Supplement: Figure 5—source data 1. [file elife-111053-fig5-data1.xlsx]

## Sheet: Fig 5H
Fig 5H
Genotype	Muscle phenotype (%)
	sphere shape	thin	split	wt
Lms>LA; LacZ (n=60)	0	3	2	95
dRyR16(n=56)	25	64	11	0
Lms>LA; dRyR RNAi (n=60)	8	80	8	4
Lms>LA; dRyR (n=56)	7	0	18	75
Lms>LA; Cam RNAi (n=50)	2	4	50	44
Lms>LA; SERCA RNAi (n=60)	0	64	4	32
n=number of analysed abdomninal segments
