# Supplementary material for: Drosophila ryanodine receptor gene triggers functional and developmental muscle properties and could be used to assess the impact of human RYR1 mutations
Source: eLife. 2026 May 13;15:RP111053. doi: 10.7554/eLife.111053 (PMC13171102; doi:10.7554/eLife.111053)
Supplement: Figure 6—source data 1. [file elife-111053-fig6-data1.xlsx]

## Sheet: Fig 6I - Larva length
Fig 6I Larva length
wt	M 4881 Ile
4	4
3.8	3.3
4	4
4	4
4	4
4	3.4
4	4
4	3.2
4	4
4	3.8
4	4
3.8	3.2
3.5	3.4
3.8	3.3
4	3.2
4	4
3.5	4
3.8	3.8
3.8	3.6
3.8	4

## Sheet: Fig 6J - Muscle VLM3 size
Fig 6J Muscle VLM3 size
wt	M 4881 Ile
341	406
379	384
364	337
373	376
337	343
317	283
388	271
380	235
383	244
343	313
385	354
387	381
387	365
388	362
342	421
329	314
430	377
308	384
315	325
315	384
333	387
345	259
340	258
301	288
312	318
419	378
346	280
426	307
411
380

## Sheet: Fig 6K -Number of nuclei (VLM3)
Fig 6K Number of nuclei (VLM3)
wt	M 4881 Ile
16	15
19	10
17	16
16	13
19	15
16	15
19	11
17	15
19	10
16	12
12	12
17	9
14	7
17	14
15	17
15	12
19	15
16	16
16	17
14	17
13	13
16	15
17	13
14	15
18	7
20	12
17	16
16	14

## Sheet: Fig 6L - Sarcomere size
Fig 6L Sarcomere size
wt	M 4881 Ile
5.03211	7.06308
6.61267	6.308
6.1025	5.12421
6.414	6.63929
5.9	5.34056
5.17632	4.41091
7.7275	4.68429
6.16267	4.07826
5.37389	4.62619
7.65846	4.97
6.96923	5.15158
6.67643	5.61294
6.83714	5.97813
5.9675	5.6
5.24167	5.75353
7.13385	5.13722
5.02895	5.82
5.06947	5.80294
4.22043	5.05158
4.24957	6.01063
5.31556	6.14938
4.51	3.66037
4.777	4.24652
5.08	3.934
5.75235	4.46045
4.5581	5.27737
6.3675	4.50273
5.89824	4.845
5.335

## Sheet: Fig 6M - Righting assay
Fig 6M Righting assay
wt	M 4881 Ile
12	33
18	31
20	31
22	35
25	20
22	21
13	22
11	16
11	35
18	40
20	40
19	55
17	20
10	22
15	20
8	25
10	17
19	19
15	35
28	20
22	45
12	48
12	35
10	37
14	29
18	35
17	36
19	40
20	28
24	35
23	36

## Sheet: Fig 6N - Motility test
Fig 6N Motility test
wt	M 4881 Ile
32	16
33	14
34	18
32	17
22	14
27	20
27	14
28	18
30	18
29	20
31	16
28	18
26	15
29	14
30	13
25	15
24	15
30	13
30	13
32	13
22	13
24	11
26	13
25	9
30	20
30	18
29	21
28	22
24	15
25	13
25	12
24	10

## Sheet: Fig 6O - Locomotor assay
Fig 6O Locomotor assay
wt	M 4881 Ile
125	180
101	190
118	170
119	170
118	177
128	187
170	190
150	187
111	163
131	186
117	169
134	164
135	180
144	208
126	205
139	206
114	197
109	165
116	170
100	175
118	180
138	154
114	174
140	158
84	210
145	180
133	212
120	180
100	178
69	196
90	164
92	164
